# Supplementary material
Source: ML conference proceedings conference paper supplement (https://proceedings.mlr.press/v70/hu17d.html)
Supplement: Supplementary file [file hu17d-supp.pdf]

---

# Supplementary Material: Deep Generative Models for Relational Data with Side Information

---

## 1. Proof of Lemma 1

We can compute  $\mathbb{E}[\mathbf{I}\{A_{ij} = 0\}]$  as

$$\begin{aligned}
& \mathbb{E}[\mathbf{I}\{A_{ij} = 0\}] = p(X_{ij} = 0) \\
&= \mathbb{E}_{\mathbf{z}_i, \mathbf{z}_j, \Lambda} \left[ \prod_{k_1, k_2}^K p(X_{ij} = 0 | z_{ik_1}, z_{jk_2}, \Lambda_{k_1 k_2}) \right] \\
&= \mathbb{E}_{\mathbf{z}_i, \mathbf{z}_j, \Lambda} \left[ \prod_{k_1, k_2=1}^K \exp(-\Lambda_{k_1 k_2} z_{ik_1} z_{jk_2}) \right] \\
&\geq \exp \left( \mathbb{E}_{\mathbf{z}_i, \mathbf{z}_j, \Lambda} \left[ \log \prod_{k_1, k_2=1}^K \exp(-\Lambda_{k_1 k_2} z_{ik_1} z_{jk_2}) \right] \right) \\
&= \mathbb{E}_{\mathbf{z}_i, \mathbf{z}_j, \Lambda} \left[ - \sum_{k_1, k_2=1}^K \Lambda_{k_1 k_2} z_{ik_1} z_{jk_2} \right] \tag{1}
\end{aligned}$$

where the inequality step follows from Jensen's inequality. Following Lemma 1 in (Zhou, 2015), we have  $\mathbb{E} \left[ \sum_{k_1, k_2=1}^K \Lambda_{k_1 k_2} \right] = \frac{\zeta \gamma_c}{\gamma_b c_{k_1 k_2}} + \frac{\gamma_a^2}{\gamma_b^2 c_{k_1 k_2}}$ . Then the last line in Equation (1) can be written as

$$\begin{aligned}
& \mathbb{E}_{\mathbf{z}_i, \mathbf{z}_j, \Lambda} \left[ - \sum_{k_1, k_2=1}^K \Lambda_{k_1 k_2} z_{ik_1} z_{jk_2} \right] \tag{2} \\
&= \exp \left( - \left[ \frac{\zeta \gamma_c}{\gamma_b c_{k_1 k_2}} + \frac{\gamma_a^2}{\gamma_b^2 c_{k_1 k_2}} \right] \mathbb{E}_{\mathbf{z}_i^{(1)} \mathbf{z}_j^{(1)}} \left[ z_{ik_1}^{(1)} z_{jk_2}^{(1)} \right] \right)
\end{aligned}$$

Based on Equation (1) and (3), the expected number of zeros in  $\mathbf{A}$  is lower bounded by

$$\begin{aligned}
& \mathbb{E} \left[ \sum_{i, j=1}^N \mathbf{I}\{A_{ij} = 0\} \right] \geq N^2 \mathbb{E}_{\mathbf{z}_i, \mathbf{z}_j, \Lambda} \left[ - \sum_{k_1, k_2=1}^K \Lambda_{k_1 k_2} z_{ik_1} z_{jk_2} \right] \\
&= N^2 \exp \left( - \left[ \frac{\zeta \gamma_c}{\gamma_b c_{k_1 k_2}} + \frac{\gamma_a^2}{\gamma_b^2 c_{k_1 k_2}} \right] \mathbb{E}_{\mathbf{z}_i^{(1)} \mathbf{z}_j^{(1)}} \left[ z_{ik_1}^{(1)} z_{jk_2}^{(1)} \right] \right) \tag{3}
\end{aligned}$$

## 2. HYPERPARAMETER INFERENCE

We sample  $\mathbf{w}_k^{(\ell)}$ ,  $b_k^{(\ell)}$  and  $\mathbf{m}_k$  leveraging the Pólya-Gamma augmentation (Polson et al., 2013). This enables us to de-

---

. Correspondence to: Changwei Hu <changweih@yahoo-inc.com>, Piyush Rai <piyush@cse.iitk.ac.in>, Lawrence Carin <lcarin@duke.edu>.

rive the Gibbs sampler updates for the hyper-parameters  $\gamma_{k_1}$ ,  $\xi$ ,  $\Gamma_{k, \ell}^{(\mathbf{w})}$  and  $\Gamma_k^{(\mathbf{m})}$ , in closed form.

**Sample  $\mathbf{w}_k^{(\ell)}$  and  $b_k^{(\ell)}$ :** We consider the update of layer-1 weights  $\mathbf{w}_k^{(1)}$  as an example, and assume the side information is available (which is the more general case). Weights for the other layers can be sampled in a similar manner.

Given the Pólya-Gamma auxiliary variables  $\alpha_k^{(1)}$ , the posterior for  $\mathbf{w}_k^{(1)}$  will be  $\mathbf{w}_k^{(1)} \sim \mathcal{N}(\boldsymbol{\mu}_k^{(w)}, \mathbf{V}_k^{(w)})$ , where

$$\begin{aligned}
\boldsymbol{\mu}_k^{(w)} &= \mathbf{V}_k^{(w)} (\mathbf{Z}^{(2)})^T (\mathbf{z}_k^{(2)} - \frac{1}{2} \mathbf{1}_N - \text{diag}(\alpha_k^{(1)}) (\mathbf{S} \mathbf{m}_k + b_k^{(1)} \mathbf{1}_N)) \\
\mathbf{V}_k^{(w)} &= ((\mathbf{Z}^{(2)})^T \text{diag}(\alpha_k^{(1)}) \mathbf{Z}^{(2)} + (\Gamma_{k, \ell}^{(w)})^{-1})^{-1}
\end{aligned}$$

In the above,  $\mathbf{1}_N$  is a vector of length  $N$  with all entries being 1, and  $\alpha_k^{(1)} \in \mathbb{R}_+^N$ , each entry  $\alpha_{ik}^{(1)}$  is drawn from the Pólya-Gamma distribution

$$\alpha_{ik}^{(1)} \sim \text{PG}(1, \mathbf{m}_k^T \mathbf{s}_i + (\mathbf{w}_k^{(1)})^T \mathbf{z}_i^{(2)} + b_k^{(1)})$$

Conditioned on these PG variables, the posterior over  $b_k^{(\ell)}$  will also be a Gaussian.

**Sample  $\mathbf{m}_k$ :** Akin to the way we sample  $\mathbf{w}_k^{(\ell)}$ , the side information based regression weights  $\mathbf{m}_k$  can also be sampled using the Pólya-Gamma scheme (using the layer 1 PG variables  $\alpha_k^{(1)}$ ). The posterior will be a Gaussian  $\mathbf{m}_k \sim \mathcal{N}(\boldsymbol{\mu}_k^{(m)}, \mathbf{V}_k^{(m)})$ , where

$$\begin{aligned}
\boldsymbol{\mu}_k^{(m)} &= \mathbf{V}_k^{(m)} \mathbf{S}^T (\mathbf{z}_k^{(2)} - \frac{1}{2} \mathbf{1}_N - \text{diag}(\alpha_k^{(1)}) (\mathbf{Z}^{(2)} \mathbf{w}_k^{(1)} + b_k^{(1)} \mathbf{1}_N)) \\
\mathbf{V}_k^{(m)} &= ((\mathbf{S}^T \text{diag}(\alpha_k^{(1)}) \mathbf{S} + (\Gamma_k^{(m)})^{-1})^{-1}
\end{aligned}$$

**Sample  $\gamma_{k_1}$ :**  $\gamma_{k_1}$  can be sampled as

$$\gamma_{k_1} \sim \text{Gamma}(\gamma_a + \ell_{k_1 k_2}, \frac{1}{\gamma_b - \sum_{k_2} \xi^{\delta_{k_1 k_2}} \frac{1 - \delta_{k_1 k_2}}{\gamma_{k_2} \ln(\frac{c_{k_1 k_2}}{Q_{k_1 k_2} + c_{k_1 k_2}})}})$$

where  $\ell_{k_1} = \sum_{k_2} \ell_{k_1 k_2}$  with  $\ell_{k_1 k_2}$  drawn from the Chinese Restaurant Table (CRT) distribution (Zhou, 2015)

$$\ell_{k_1 k_2} \sim \text{CRT}(X_{\cdot k_1 k_2}, g_{k_1 k_2})$$

**Sample  $\xi$ :** The hyperparameter  $\xi$  can be sampled as

$$\xi \sim \text{Gamma}(\xi_a + \sum_k \ell_{kk}, \frac{1}{\xi_b - \sum_k \gamma_k \ln(\frac{c_{kk}}{Q_{kk} + c_{kk}})})$$

**Sample**  $\Gamma_{k,\ell}^{(w)}, \Gamma_k^{(m)}$ : Each diagonal entry of the precision matrix  $\Gamma_{k,\ell}^{(w)}$  is sampled as

$$\Gamma_{k,\ell}^{(w)} \sim \text{Gamma}\left(a + \frac{K_{\ell+1}}{2}, \frac{1}{\text{diag}((b + 0.5(\mathbf{w}_k^{(\ell)})^T \mathbf{w}_k^{(\ell)}) \mathbf{1}_{K_{\ell+1}})}\right)$$

where  $a$  and  $b$  are the scale and rate parameters for the prior of  $\Gamma_{k,\ell}^{(w)}$  respectively.  $\Gamma_k^{(m)}$  can be sampled similarly.

## References

- Polson, Nicholas G, Scott, James, and Windle, Jesse. Bayesian inference for logistic models using pólya–gamma latent variables. *Journal of the American Statistical Association*, 108(504):1339–1349, 2013.
- Zhou, Mingyuan. Infinite edge partition models for overlapping community detection and link prediction. In *AISTATS*, 2015.
